# Supplementary material for: Effectiveness of a Web-Based Multiple Tailored Smoking Cessation Program: A Randomized Controlled Trial Among Dutch Adult Smokers
Source: PubMed Central journal article supplement (PMC3414857; doi:10.2196/jmir.1812), 2012-06-11
Supplement: jmir_v14i3e82_app1.pdf [file jmir_v14i3e82_app1.pdf]

## APPENDIX 1 Results from complete-case analyses

**Table 5.** Effects of the web-based smoking cessation intervention on several behavioural outcomes at six-week follow-up among Dutch adult smokers (N=449) recruited from December 2009 up until June 2010 - complete cases

| Model                         | 24-hour ppa <sup>a</sup> |                     |        | 7-day ppa <sup>a</sup> |                     |        | Prolonged abstinence |                     |        |
|-------------------------------|--------------------------|---------------------|--------|------------------------|---------------------|--------|----------------------|---------------------|--------|
|                               | OR <sup>b</sup>          | 95% CI <sup>c</sup> | Pvalue | OR <sup>b</sup>        | 95% CI <sup>c</sup> | Pvalue | OR <sup>b</sup>      | 95% CI <sup>c</sup> | Pvalue |
| Intervention <sup>d</sup>     | 2.12                     | 1.41-3.17           | .000*  | 2.43                   | 1.55-3.79           | .000*  | 2.13                 | 1.33-3.42           | .002*  |
| Intervention <sup>d</sup>     | 2.07                     | 1.38-3.13           | .001*  | 2.50                   | 1.59-3.94           | .000*  | 2.14                 | 1.32-3.46           | .002*  |
| Medium education <sup>e</sup> | .63                      | .36-1.09            | .10    | .57                    | .32-1.02            | .06    | .59                  | .31-1.09            | .09    |
| High education <sup>e</sup>   | 1.00                     | .57-1.76            | 1.00   | .68                    | .37-1.24            | .21    | .80                  | .43-1.51            | .49    |

<sup>a</sup>Point prevalence abstinence.

<sup>b</sup>Odds ratio.

<sup>c</sup>Confidence interval.

<sup>d</sup>Control group is the reference category.

<sup>e</sup>Low education is the reference category.

\* $P < .05$ .

**Table 6.** Effects of the web-based smoking cessation intervention on several behavioural outcomes at six-month follow-up among Dutch adult smokers (N=291) recruited from December 2009 up until June 2010 - complete cases

| Model                         | 24-hour ppa <sup>a</sup> |                     |        | 7-day ppa <sup>a</sup> |                     |        | Prolonged abstinence |                     |        |
|-------------------------------|--------------------------|---------------------|--------|------------------------|---------------------|--------|----------------------|---------------------|--------|
|                               | OR <sup>b</sup>          | 95% CI <sup>c</sup> | Pvalue | OR <sup>b</sup>        | 95% CI <sup>c</sup> | Pvalue | OR <sup>b</sup>      | 95% CI <sup>c</sup> | Pvalue |
| Intervention <sup>d</sup>     | 1.69                     | 1.02-2.81           | .04*   | 1.51                   | .90-2.54            | .12    | 1.29                 | .67-2.49            | .45    |
| Intervention <sup>d</sup>     | 1.65                     | .98-2.76            | .06    | 1.54                   | .90-2.61            | .11    | 1.46                 | .74-2.87            | .27    |
| Medium education <sup>e</sup> | .68                      | .33-1.37            | .28    | .65                    | .32-1.32            | .24    | .45                  | .20-1.01            | .05    |
| High education <sup>e</sup>   | 1.02                     | .50-2.08            | .97    | .76                    | .37-1.57            | .45    | .37                  | .15-.89             | .03*   |

<sup>a</sup>Point prevalence abstinence.

<sup>b</sup> Odds ratio.

<sup>c</sup> Confidence interval.

<sup>d</sup> Control group is the reference category.

<sup>e</sup> Low education is the reference category.

\* $P < .05$ .
